# Supplementary material for: Enhanced Raman sensitivity and magnetic separation for urolithiasis detection using phosphonic acid-terminated Fe3O4 nanoclusters
Source: Royal Society of Chemistry journal article supplement (doi:10.1039/c5tb00419e), 2015-01-01
Supplement: c5tb00419e1.pdf [file c5tb00419e1.pdf]

# Supporting Information

## Enhanced Raman sensitivity and magnetic separation for urolithiasis detection using phosphonic acid-terminated Fe<sub>3</sub>O<sub>4</sub> nanoclusters.

*Yi-Chun Chiu*<sup>1</sup>, *Po-An Chen*<sup>2</sup>, *Po-Yang Chang*<sup>2</sup>, *Cheng-Yang Hsu*<sup>2</sup>, *Ching-Wei Tao*<sup>3</sup>, *Chih-Chia Huang*<sup>2,3,5\*</sup>, and *Huihua Kenny Chiang*<sup>2,3,4\*</sup>

<sup>1</sup>Division of Urology, Department of Surgery, Zhong Xiao Branch, Taipei City Hospital, Taipei, Taiwan

<sup>2</sup> Institute of Biophotonics, National Yang-Ming University, Taipei, Taiwan

<sup>3</sup> Institute of Biomedical Engineering, National Yang-Ming University, Taipei, Taiwan

<sup>4</sup> Biophotonics and Molecular Imaging Research Center (BMIRC), National Yang-Ming University, Taipei, 112, Taiwan

<sup>5</sup> Department of Photonics, Center for Micro/Nano Science and Technology, and Advanced Optoelectronic Technology Center, National Cheng Kung University, 701, Tainan, Taiwan.

Email: c2huang@mail.ncku.edu.tw; hkchiang@ym.edu.tw

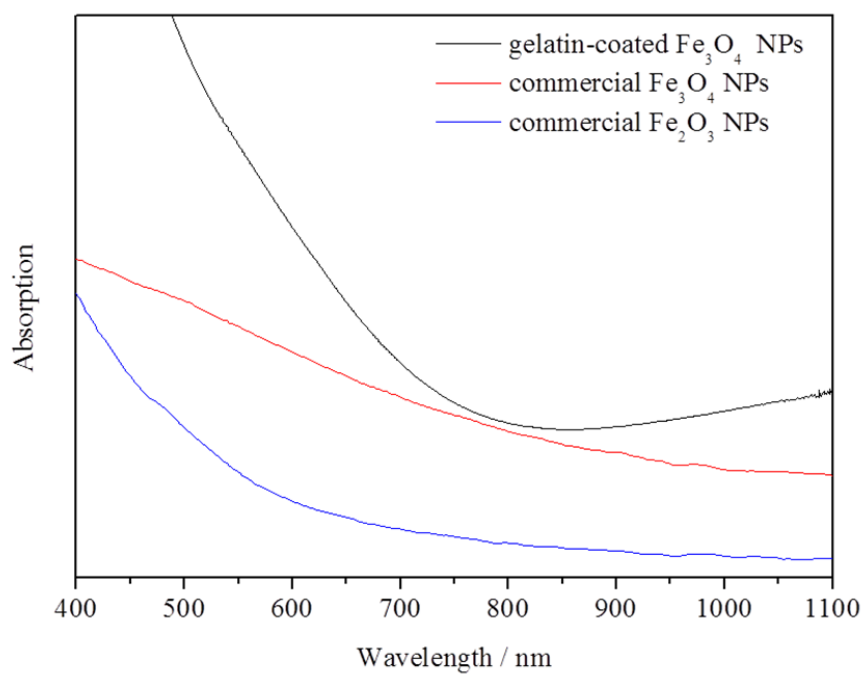

**Figure S1.** UV-visible spectra of gelatin-coated Fe<sub>3</sub>O<sub>4</sub> NPs, commercial Fe<sub>3</sub>O<sub>4</sub> NPs (Alfa Aesar; 20-30 nm), and Fe<sub>2</sub>O<sub>3</sub> NPs (Sigma-Aldrich; < 50 nm).

Figure S2a shows a FT-IR spectrum of gelatin-coated Fe<sub>3</sub>O<sub>4</sub> nanoclusters. A band at 570 cm<sup>-1</sup> is consistent with the Fe–O vibrations of the Fe<sub>3</sub>O<sub>4</sub> structure.<sup>1</sup> The absorptions at 1633 cm<sup>-1</sup>, 1548 cm<sup>-1</sup>, 1263 cm<sup>-1</sup> were assigned to amide I (1600–1690 cm<sup>-1</sup>, C=O stretching), amide II (1480–1575 cm<sup>-1</sup>, CN stretching, NH bending), and amide III (1229–1301 cm<sup>-1</sup>, CN stretching, NH bending) from gelatin molecule. Peaks at 1580 cm<sup>-1</sup> and 1425 cm<sup>-1</sup> are due to the presence of vas(COO)<sup>-</sup> and vs(COO)<sup>-</sup>, respectively,<sup>1,3</sup> from organic gelatin, citrate, and TMA molecules capped onto the surface of the Fe<sub>3</sub>O<sub>4</sub> nanoclusters. A broaden band coupled with peaks at 952 cm<sup>-1</sup> and 860 cm<sup>-1</sup> is possible related to γ(O–H · · O) and δ(C–O) groups.<sup>3</sup>

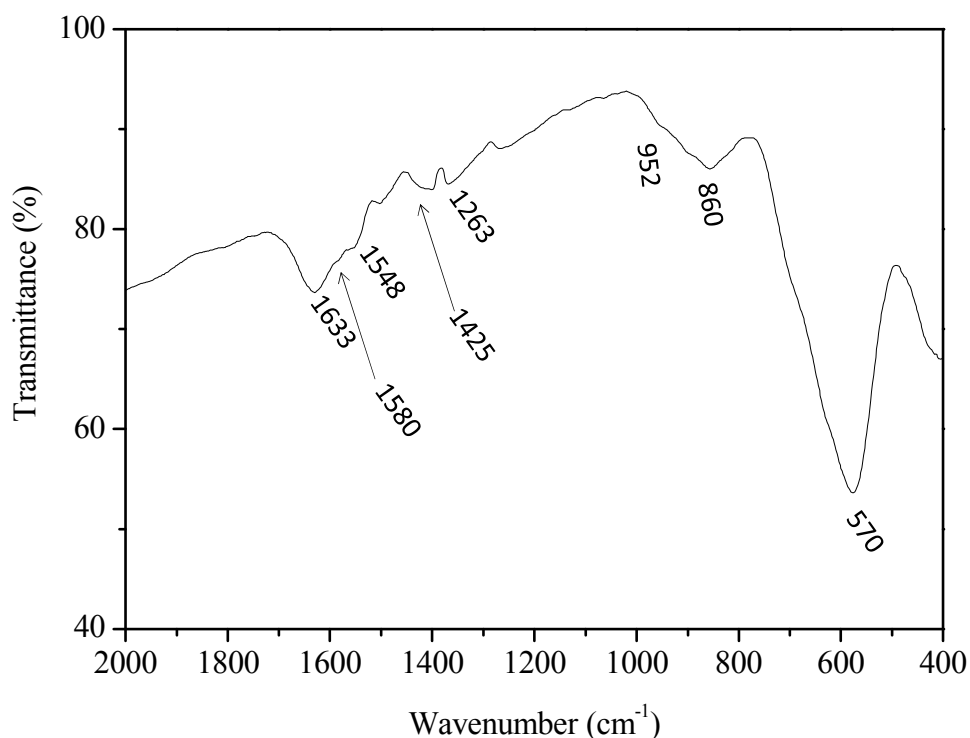

**Figure S2.** FT-IR measurement of as-prepared gelatin-coated Fe<sub>3</sub>O<sub>4</sub> nanoclusters.

#### References

1. G. V. M. Jacintho, A. G. Brolo, P. Corio, P. A. Z. Suarez, and J. C. Rubim, *J. Phys. Chem. C*, **2009**, *113*, 7684.
2. J. Banker, *Biochim. Biophys. Acta*, **1992**, *1120*, 123.
3. Filipe A. Almeida Paz and Jacek Klinowski, *Inorg. Chem.*, **2004**, *43*, 3882

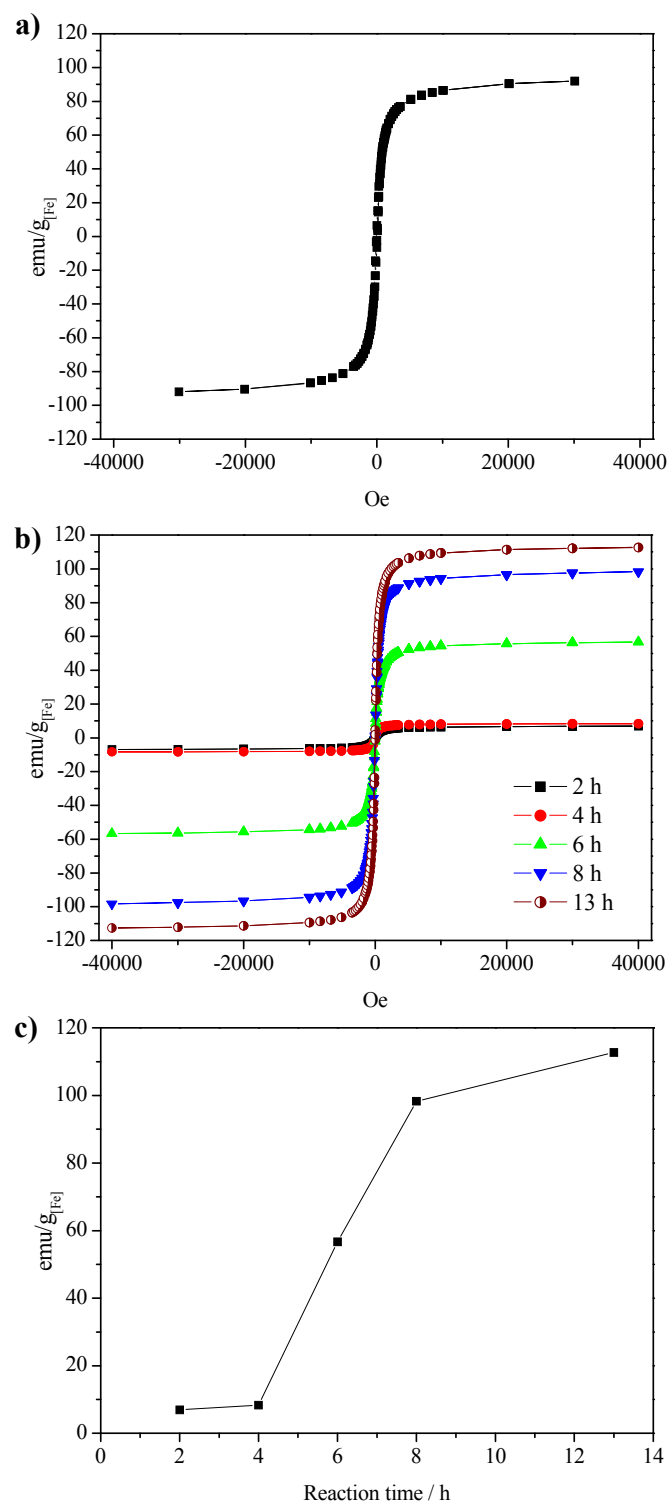

**Figure S3.** a) SQUID measurements of M-H plot (300K) of  $\text{N}_2\text{H}_4/\text{gelatin-free } \text{Fe}_3\text{O}_4$  nanoparticles. SQUID measurements of b) M-H plot (300 K) and c) Ms value-reaction time plot of as-synthesized  $\text{Fe}_3\text{O}_4$  nanoclusters obtained at different reaction time.

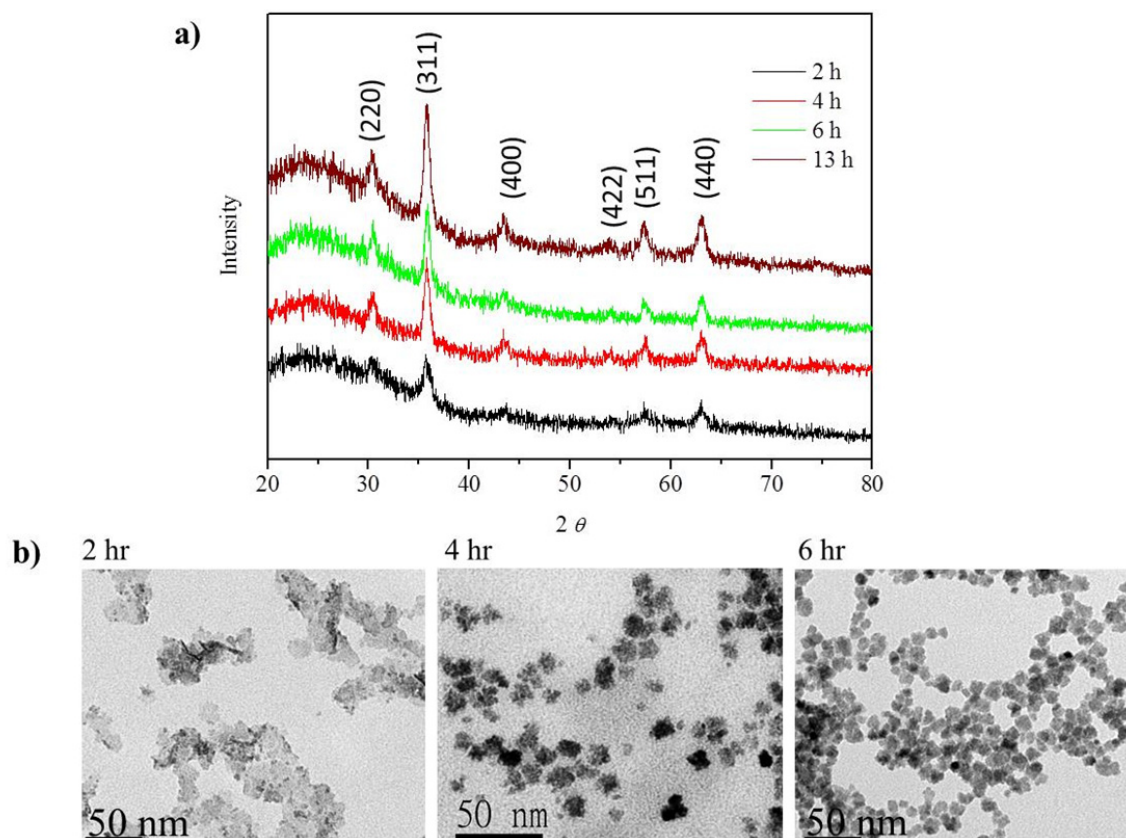

**Figure S4.** Time-dependent a) XRD patterns and b) TEM images of gelatin-coated  $\text{Fe}_3\text{O}_4$  nanoclusters prepared at different reaction times.

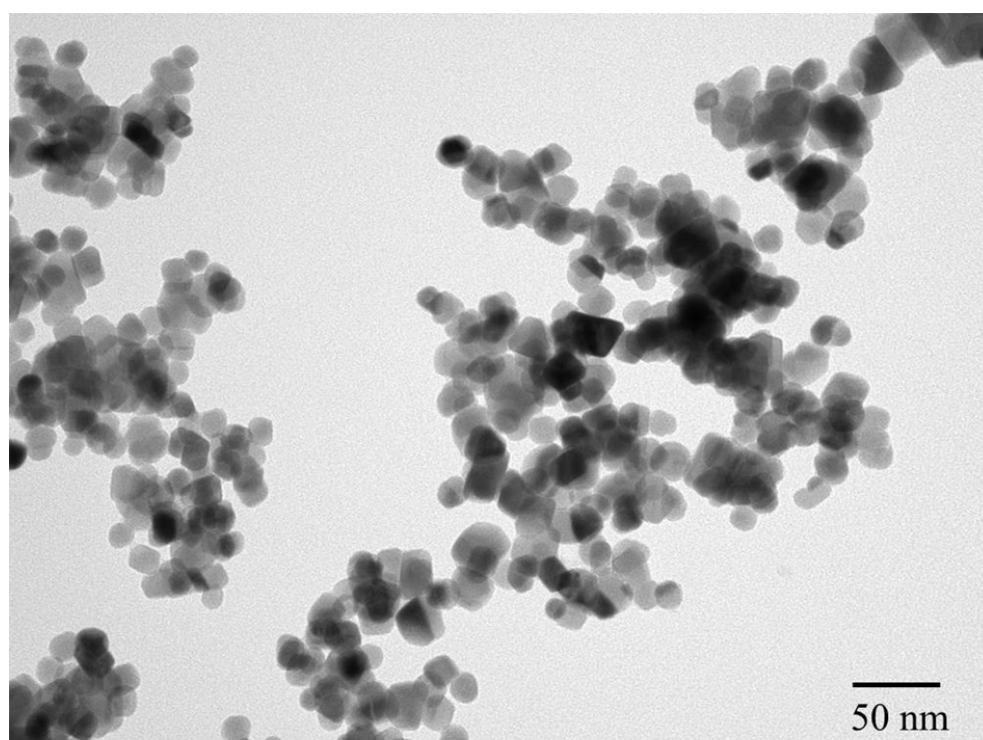

**Figure S5.** TEM image of gelatin-free Fe<sub>3</sub>O<sub>4</sub> nanoclusters.

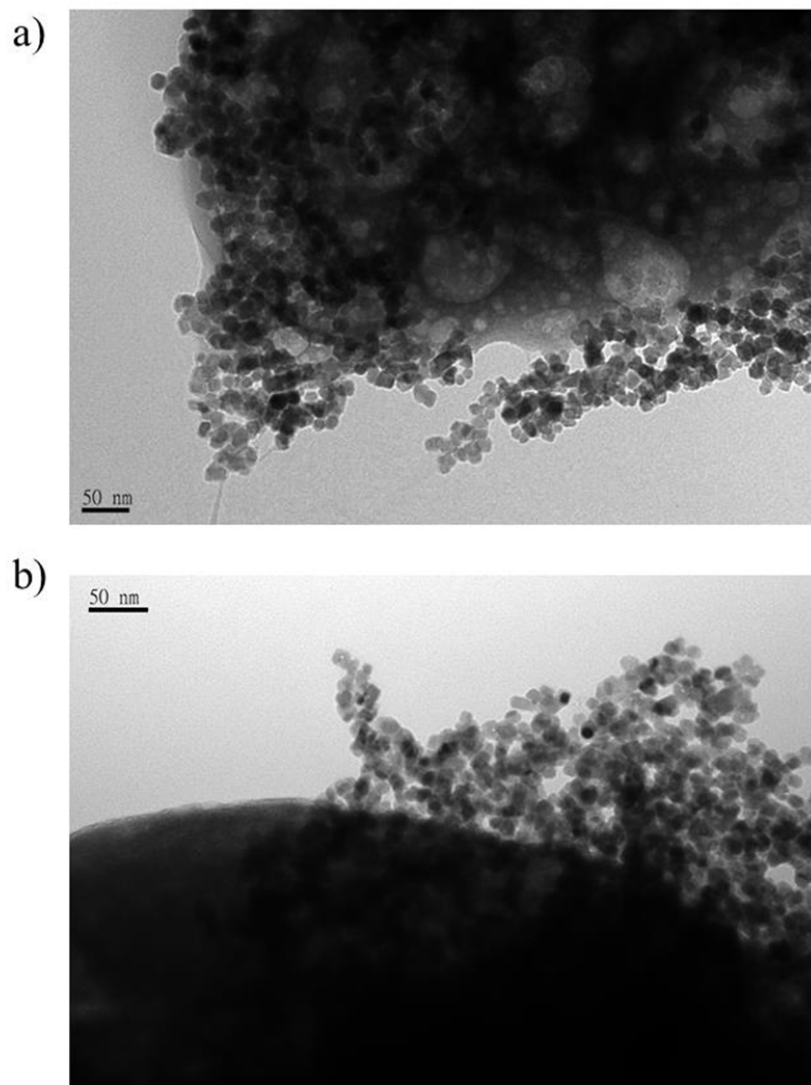

**Figure S6.** TEM images of Fe<sub>3</sub>O<sub>4</sub> nanoclusters coating on the surface of a) COD and b) COM crystals.

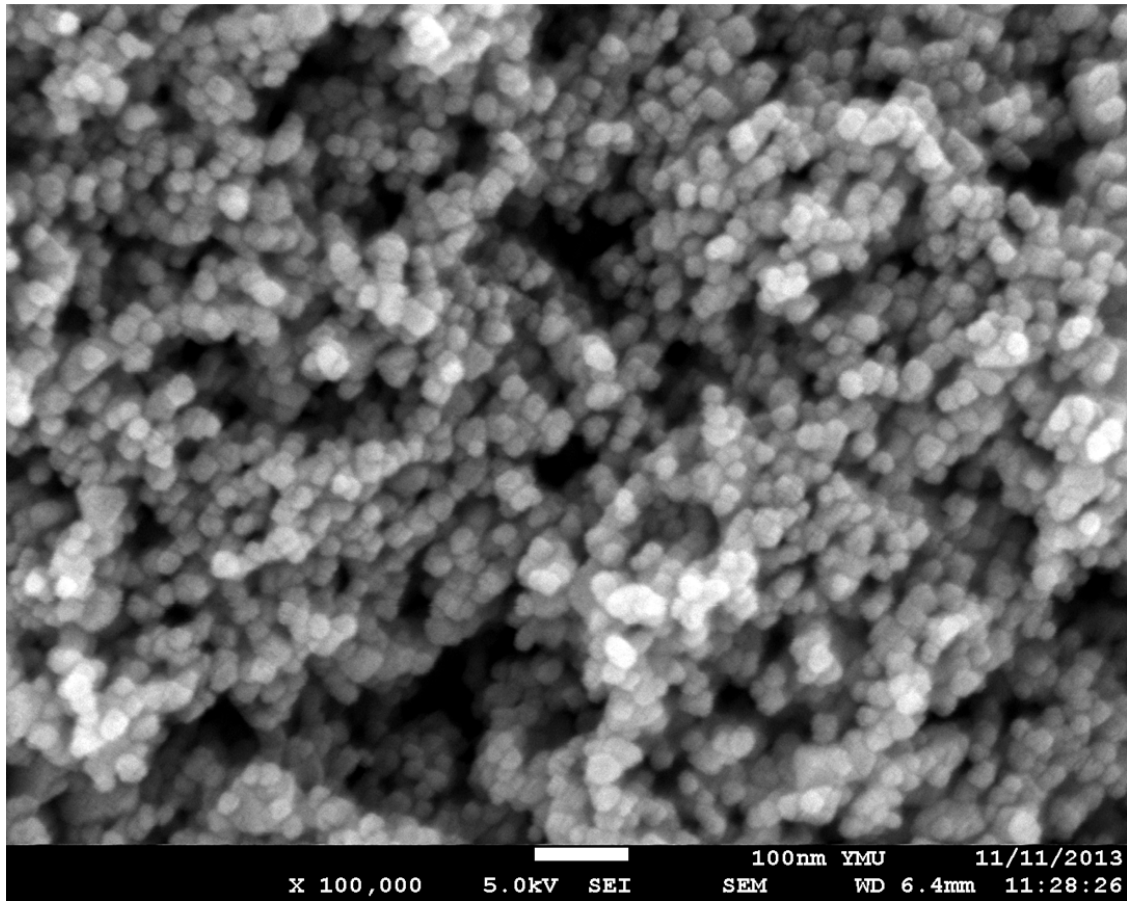

**Figure S7.** SEM images of gelatin-coated Fe<sub>3</sub>O<sub>4</sub> nanoclusters deposited on the surface of a Si wafer.



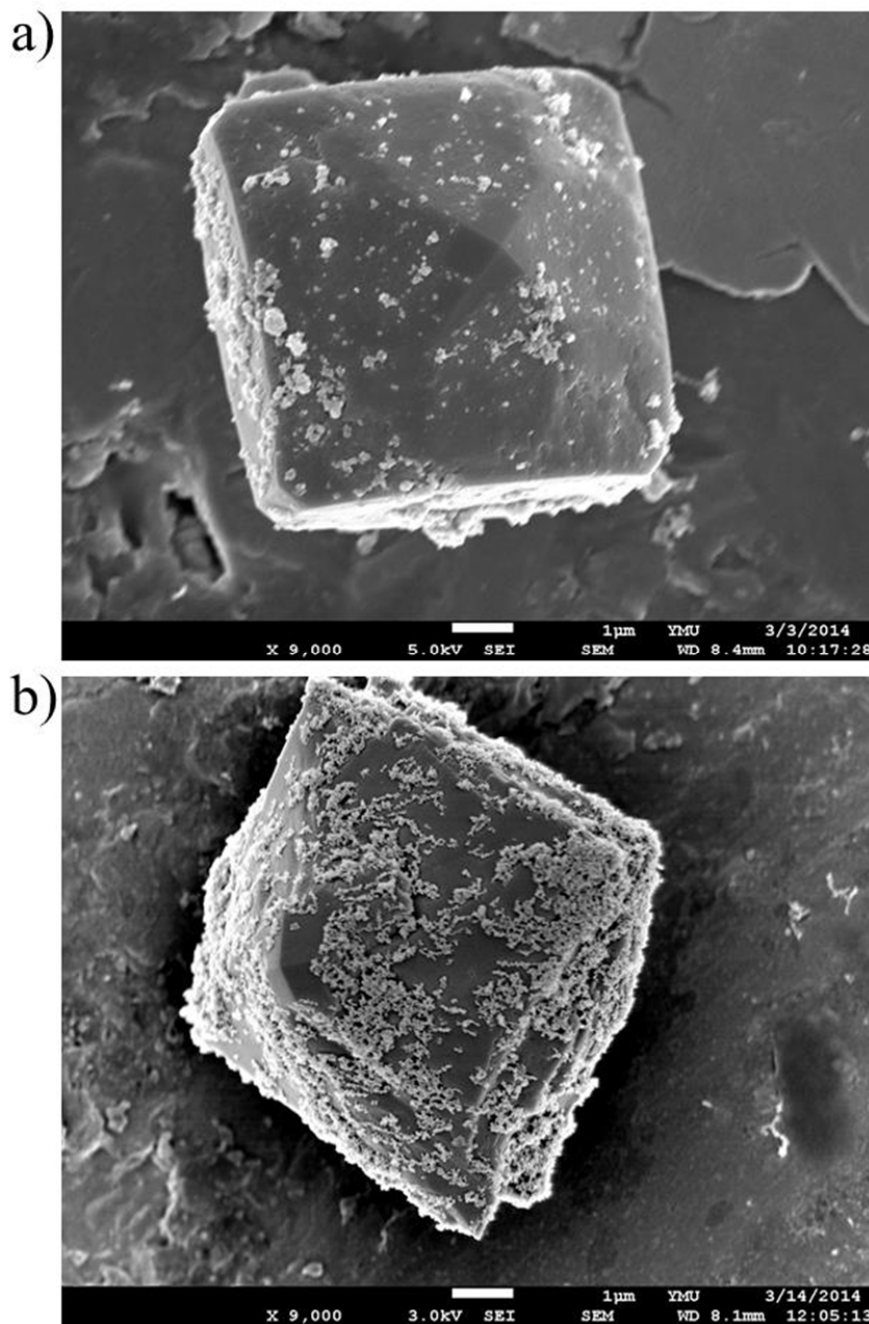

**Figure S8.** SEM images of a) gelatin-coated  $\text{Fe}_3\text{O}_4$  nanoclusters and b) phosphonic acid-terminated  $\text{Fe}_3\text{O}_4$  nanoclusters attached to the surface of COD crystals.

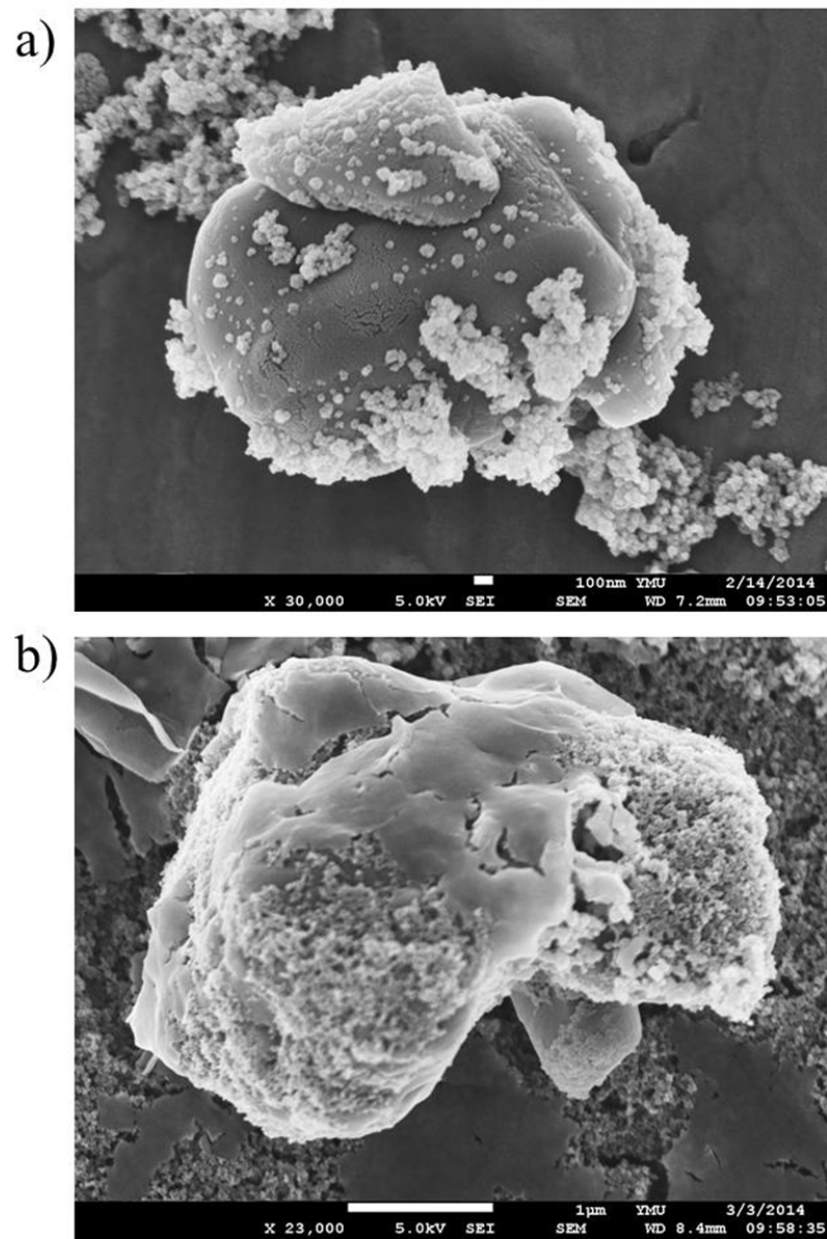

**Figure S9.** SEM images of a) gelatin-coated  $\text{Fe}_3\text{O}_4$  nanoclusters and b) phosphonic acid-terminated  $\text{Fe}_3\text{O}_4$  nanoclusters attached to the surface of COM crystals.

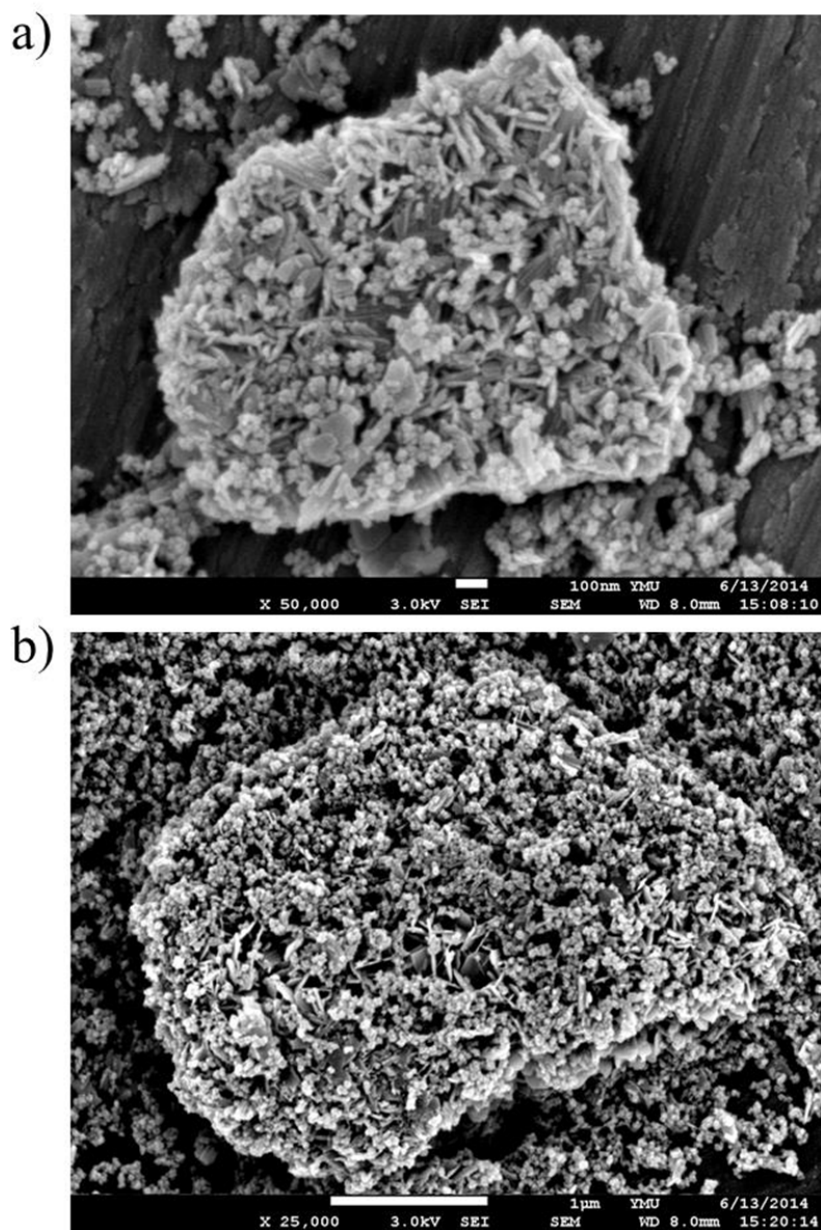

**Figure S10.** SEM images of a) gelatin-coated  $\text{Fe}_3\text{O}_4$  nanoclusters and b) phosphonic acid-terminated  $\text{Fe}_3\text{O}_4$  nanoclusters attached to the surface of HAP crystals.

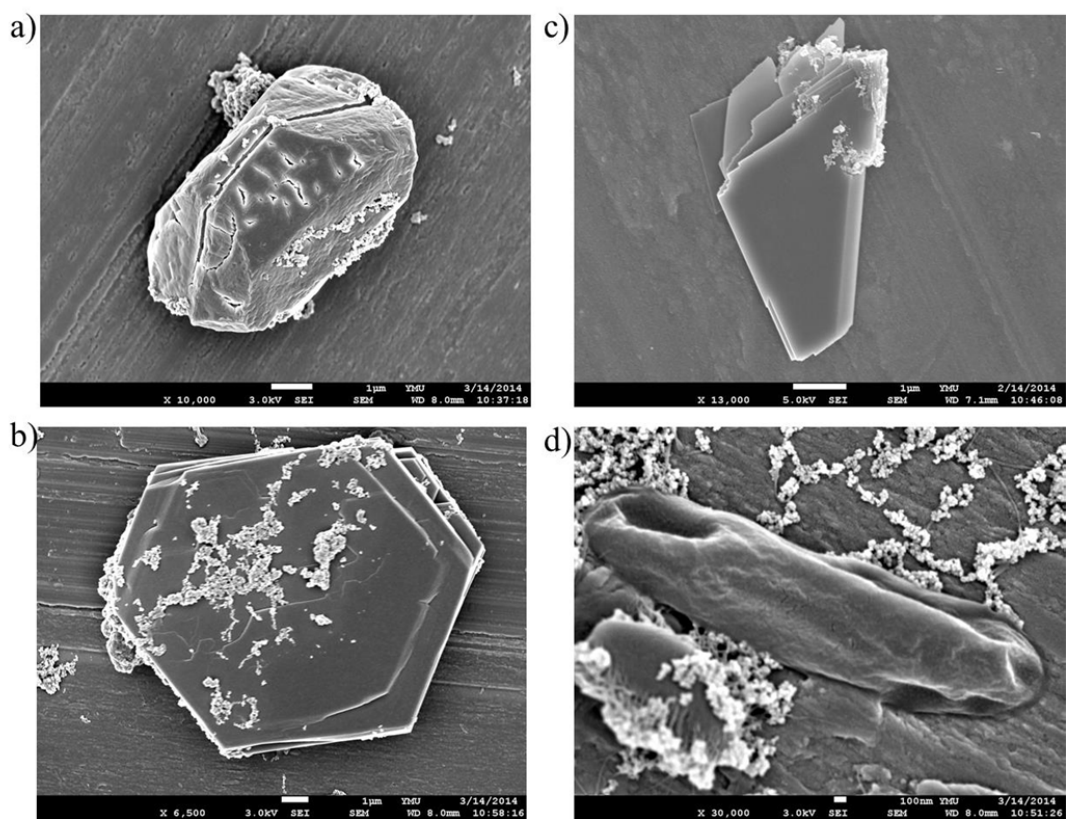

**Figure S11.** SEM images of gelatin-coated  $\text{Fe}_3\text{O}_4$  nanoclusters attached to the surface of a) MG, b) Cys, c) DCPD, and d) UA crystals.

Because the regular geometry of COD crystals favored a theory measurement, we calculated the coating density of phosphate terminal  $\text{Fe}_3\text{O}_4$  nanoclusters on a COD crystal using Matlab software (Figure S11). The bright contrast was mapped to calculate the total areas of  $\text{Fe}_3\text{O}_4$  nanoclusters in the 1/8 surface of a COM crystal, including a triangle and a rectangle block. We assumed each particle of the  $\text{Fe}_3\text{O}_4$  nanocluster consisted of three  $\text{Fe}_3\text{O}_4$  nanocrystals, leading to a contribution of  $\sim 40$  nm in height. As a result, a rough estimation gave approximately  $3.44 \times 10^6$   $\text{Fe}_3\text{O}_4$  NPs anchored to a single COD crystal.

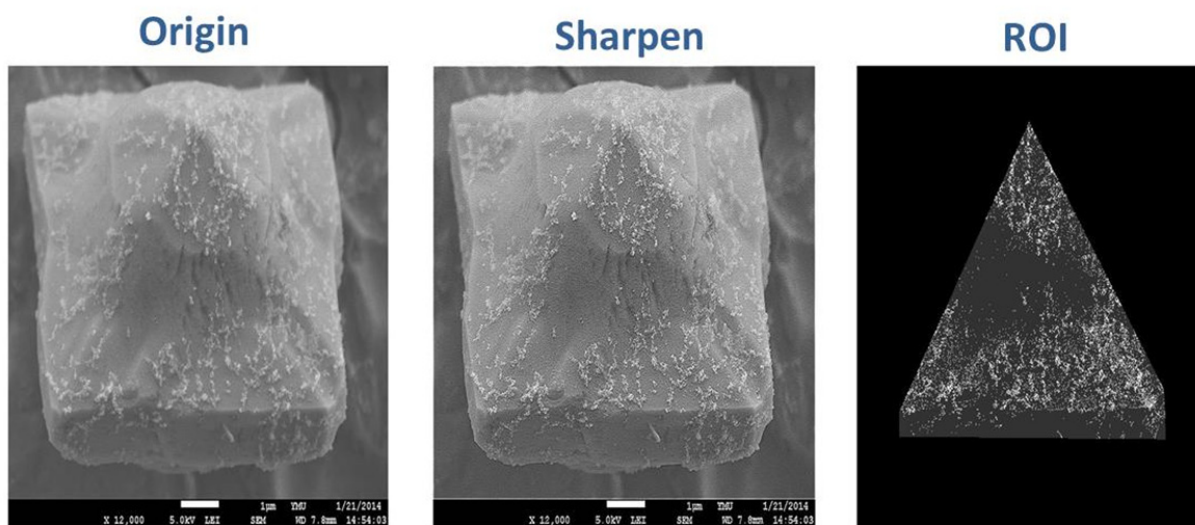

**Figure S12.** Imaging analysis of the coverage of phosphonic acid-terminated  $\text{Fe}_3\text{O}_4$  nanoclusters onto a single COD crystal, followed with treatment of imaging sharpening (middle) and ROI selection (right) for the quantitative calculation of brightening spots in the ROI area, which was performed using a Matlab algorithm.

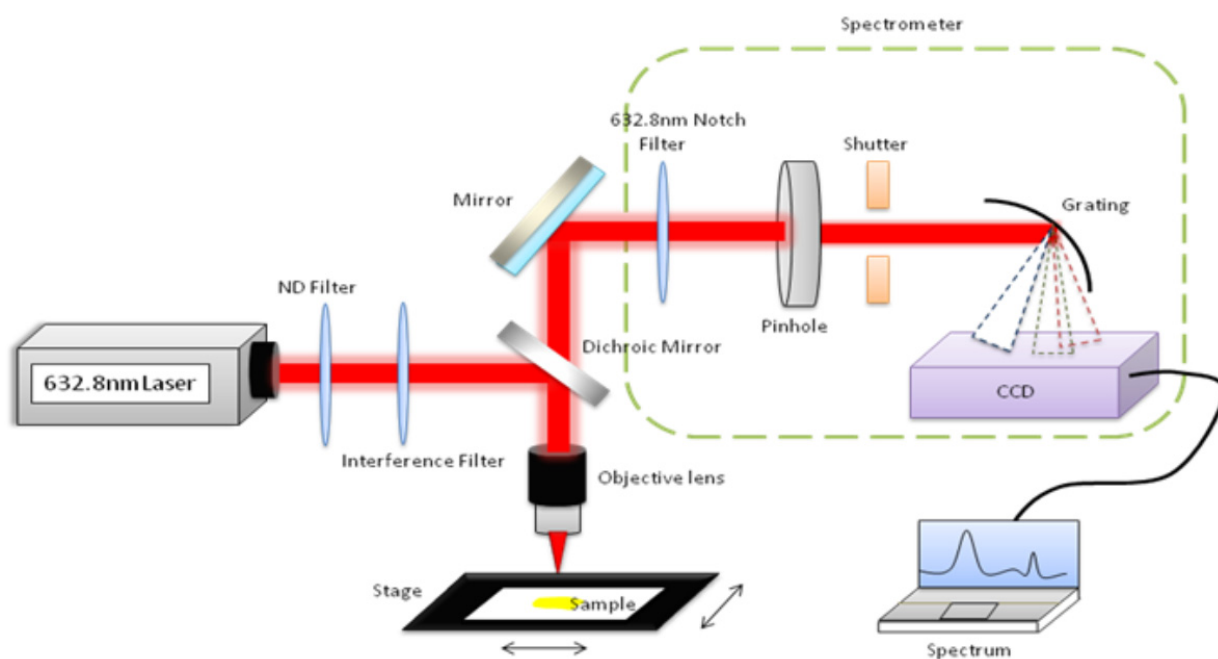

**Figure S13.** Illustration of our custom-built Raman spectroscopy system equipped with a 632.8 nm laser.

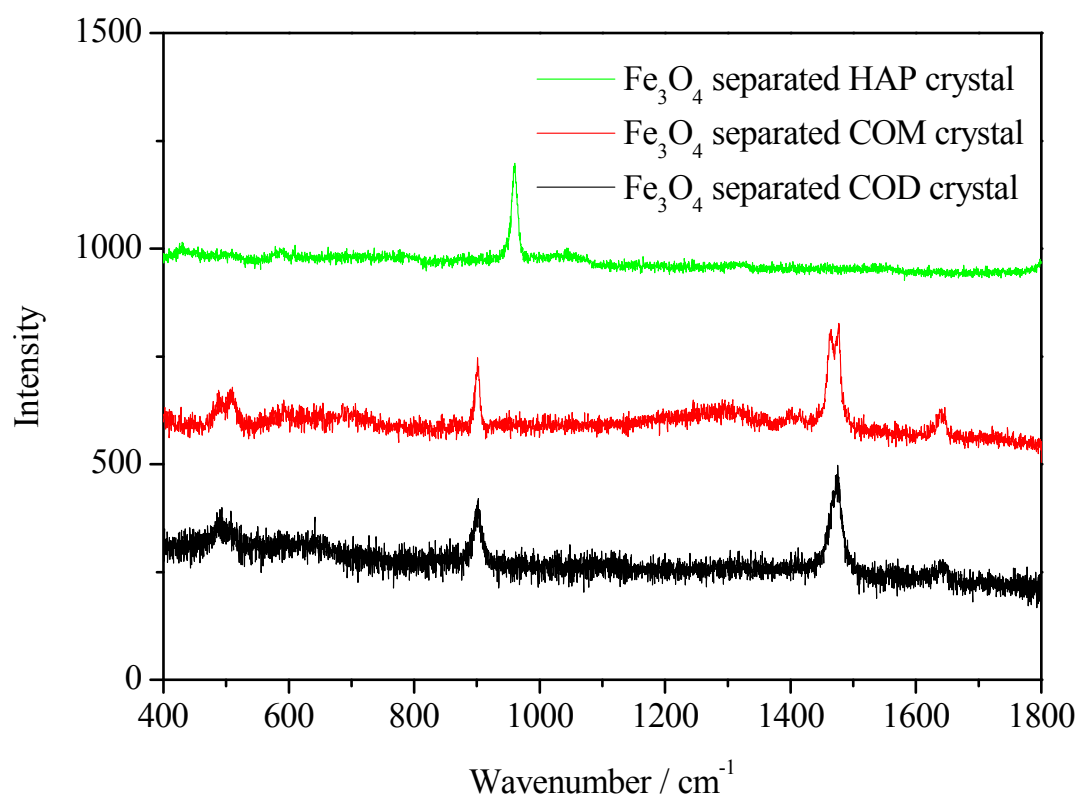

**Figure S14.** Raman spectra of Fe<sub>3</sub>O<sub>4</sub>-COD, Fe<sub>3</sub>O<sub>4</sub>-COM and Fe<sub>3</sub>O<sub>4</sub>-HAP, where the Ca-based samples were used from standard powders.

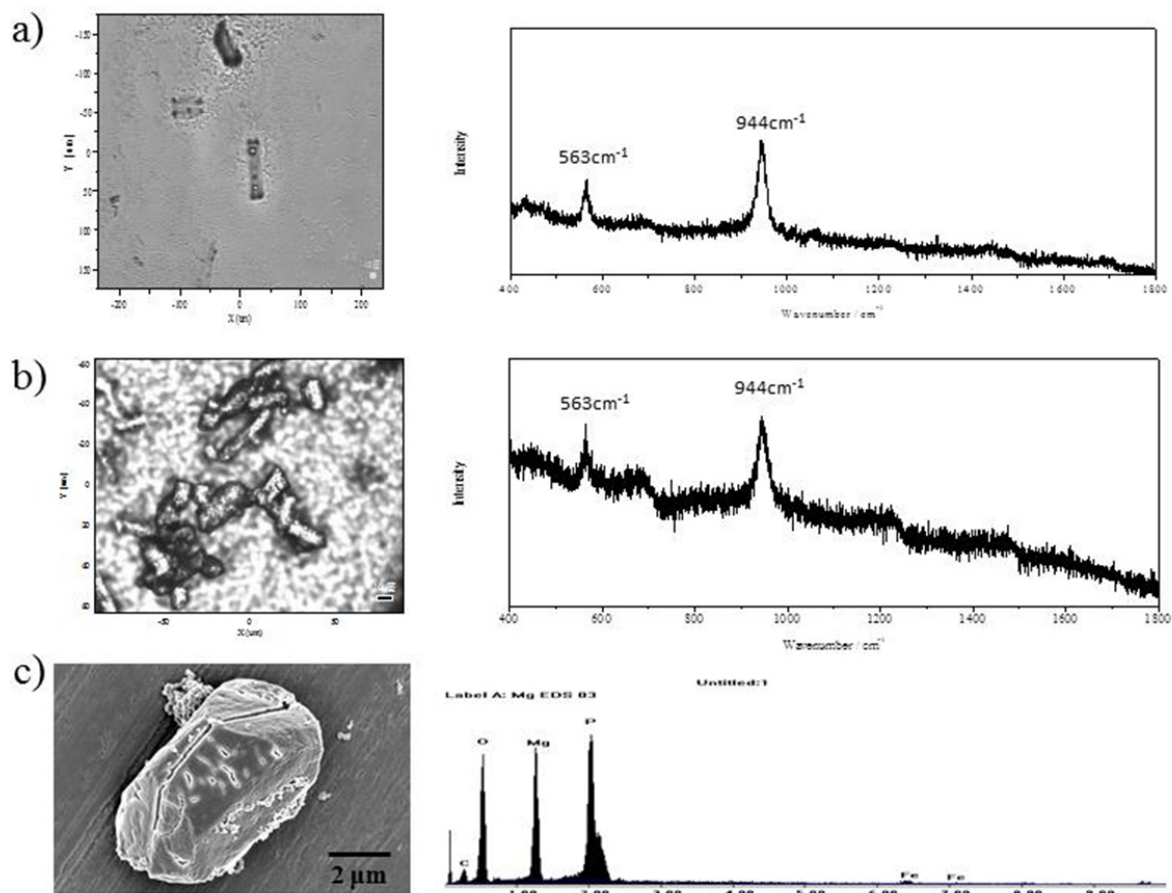

**Figure S15.** Optical image and Raman spectra of struvite crystals before a) and after b) binding with phosphonic acid-terminated  $\text{Fe}_3\text{O}_4$  nanoclusters. c) SEM and EDS measurements of struvite crystals after binding with phosphonic acid-terminated  $\text{Fe}_3\text{O}_4$  nanoclusters.



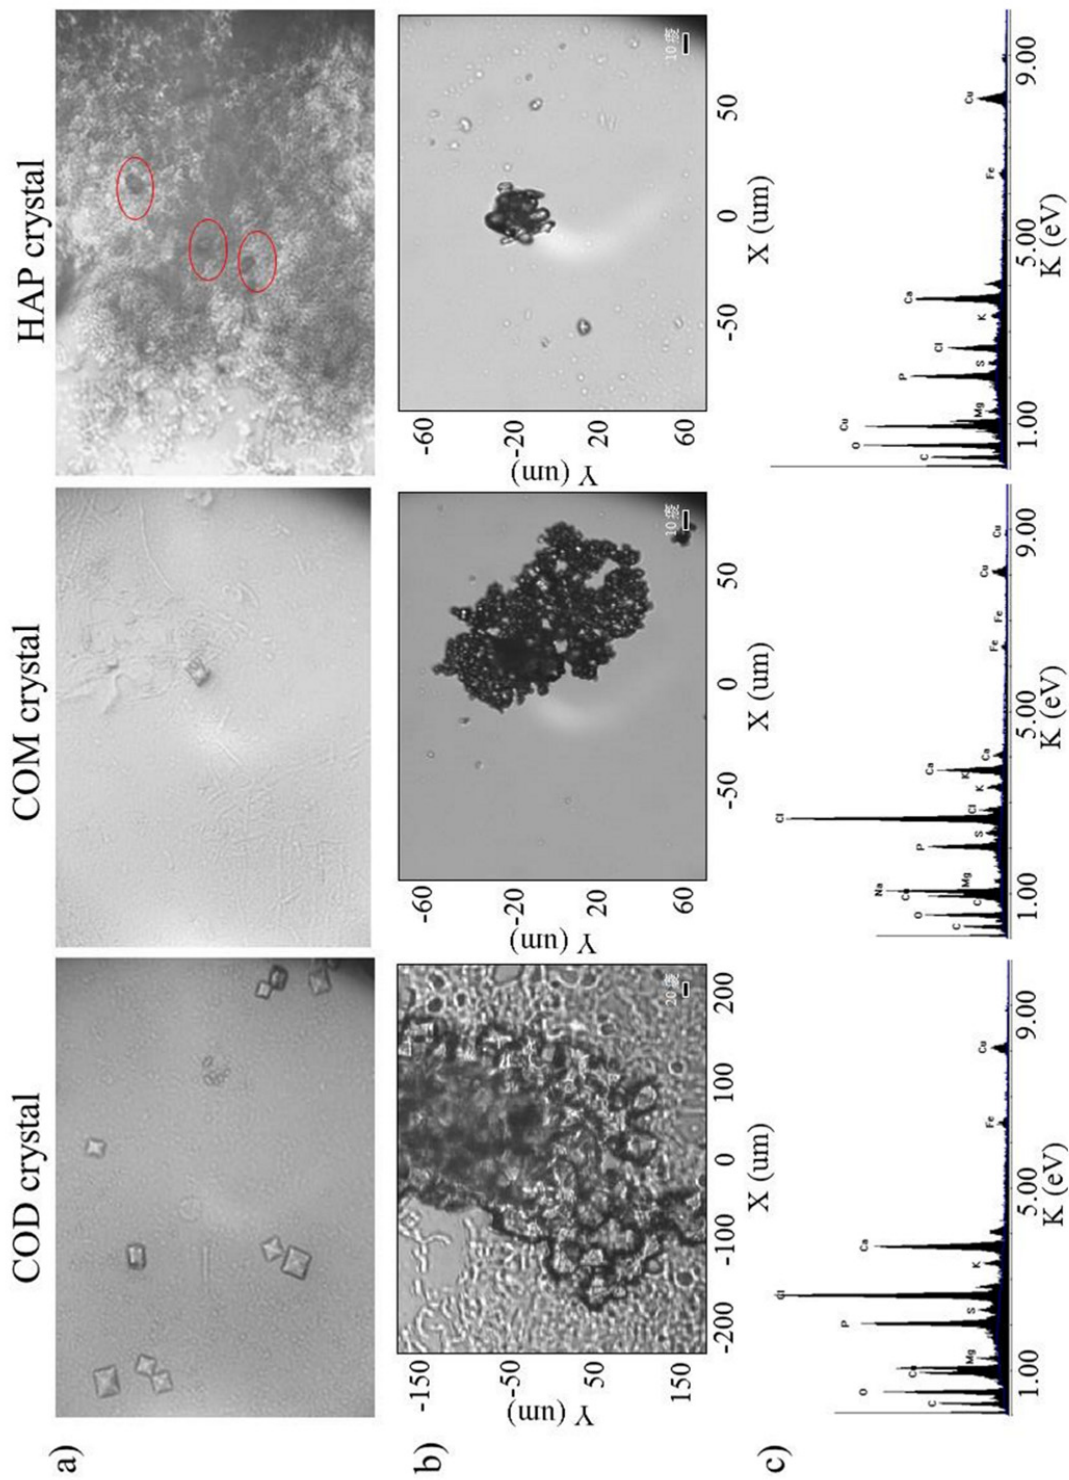

**Figure S16.** Bright-field images of urinary crystals with a) physical collection and b) magnetic collection with phosphonic acid-terminated  $\text{Fe}_3\text{O}_4$  nanoclusters. c) EDS measurements of the phosphonic acid-terminated  $\text{Fe}_3\text{O}_4$  nanoclusters-urinary crystals.
